# Supplementary material
Source: publisher figshare collection journal article supplement (https://brill.figshare.com/ndownloader/files/26241913)
Supplement: Supplementary file 1 [file 26241913]

Table A2. Pairwise correlation coefficients for all climatic variables within model 2 and 3.

|  | Calling males | Days since rainfall (>3 mm) to 6 am | Lunar illumination (%) | Night-time mean temperature (°C) | Night-time maximum temperature (°C) | Night-time minimum temperature (°C) | Night-time mean humidity (%) | Night-time mean barometric pressure (hPa) | Night-time mean wind speed (km/h) | Day-time maximum temperature (°C) | Day-time minimum temperature (°C) | Day-time mean temperature (°C) | Day-time mean humidity (%) | Day-time mean barometric pressure (hPa) | Day-time mean wind speed (km/h) |
| --- | --- | --- | --- | --- | --- | --- | --- | --- | --- | --- | --- | --- | --- | --- | --- |
| Calling males | 1 | –0.4318 | 0.0602 | –0.0404 | –0.0742 | –0.0057 | 0.1815 | –0.2788 | 0.1928 | –0.2108 | 0.0292 | –0.1459 | 0.3108 | –0.2601 | 0.2918 |
| Days since rainfall (>3 mm) to 6 am | – | 1 | –0.0107 | 0.31 | 0.3423 | 0.2957 | –0.1767 | 0.0137 | 0.0804 | 0.2588 | 0.265 | 0.3402 | –0.2587 | 0.0153 | –0.0169 |
| Lunar illumination (%) | – | – | 1 | –0.0027 | –0.0117 | –0.0296 | 0.1354 | –0.0174 | 0.1151 | –0.0683 | 0.0504 | –0.0488 | 0.1904 | 0.0044 | 0.019 |
| Night-time mean temperature (°C) | – | – | – | 1 | 0.9843 | 0.9701 | –0.5697 | –0.6431 | 0.0548 | 0.7283 | 0.743 | 0.8786 | –0.4202 | –0.5541 | –0.2271 |
| Night-time maximum temperature (°C) | – | – | – | – | 1 | 0.927 | –0.5879 | –0.6236 | 0.0665 | 0.7671 | 0.7306 | 0.9069 | –0.4677 | –0.5559 | –0.2149 |
| Night-time minimum temperature (°C) | – | – | – | – | – | 1 | –0.491 | –0.6583 | 0.0522 | 0.6593 | 0.7608 | 0.8262 | –0.3458 | –0.5479 | –0.2176 |
| Night-time mean humidity (%) | – | – | – | – | – | – | 1 | 0.405 | –0.0123 | –0.4837 | –0.1851 | –0.496 | 0.8129 | 0.3984 | 0.0627 |
| Night-time mean barometric pressure (hPa) | – | – | – | – | – | – | – | 1 | –0.1503 | –0.5271 | –0.4777 | –0.5722 | 0.2789 | 0.9431 | –0.0077 |
| Night-time mean wind speed (km/h) | – | – | – | – | – | – | – | – | 1 | 0.0988 | 0.0183 | 0.0978 | –0.0062 | –0.1721 | 0.7029 |
| Day-time maximum temperature (°C) | – | – | – | – | – | – | – | – | – | 1 | 0.6401 | 0.9364 | –0.6577 | –0.5679 | –0.1721 |
| Day-time minimum temperature (°C) | – | – | – | – | – | – | – | – | – | – | 1 | 0.803 | –0.231 | –0.4807 | –0.1285 |
| Day-time mean temperature (°C) | – | – | – | – | – | – | – | – | – | – | – | 1 | –0.5898 | –0.5769 | –0.1741 |
| Day-time mean humidity (%) | – | – | – | – | – | – | – | – | – | – | – | – | 1 | 0.3319 | 0.0755 |
| Day-time mean barometric pressure (hPa) | – | – | – | – | – | – | – | – | – | – | – | – | – | 1 | –0.1078 |
| Day-time mean wind speed (km/h) | – | – | – | – | – | – | – | – | – | – | – | – | – | – | 1 |
